# Supplementary material for: Fluconazole-Resistant Candida parapsilosis Bloodstream Isolates with Y132F Mutation in ERG11 Gene, South Korea
Source: PubMed Central journal article supplement (PMC6106402; doi:10.3201/eid2409.180625), 2018-09
Supplement: 18-0625-Techapp-s1.pdf [file 18-0625-Techapp-s1.pdf]

# Fluconazole-Resistant *Candida parapsilosis* Bloodstream Isolates with Y132F Mutation in *ERG11* Gene, South Korea

## Technical Appendix

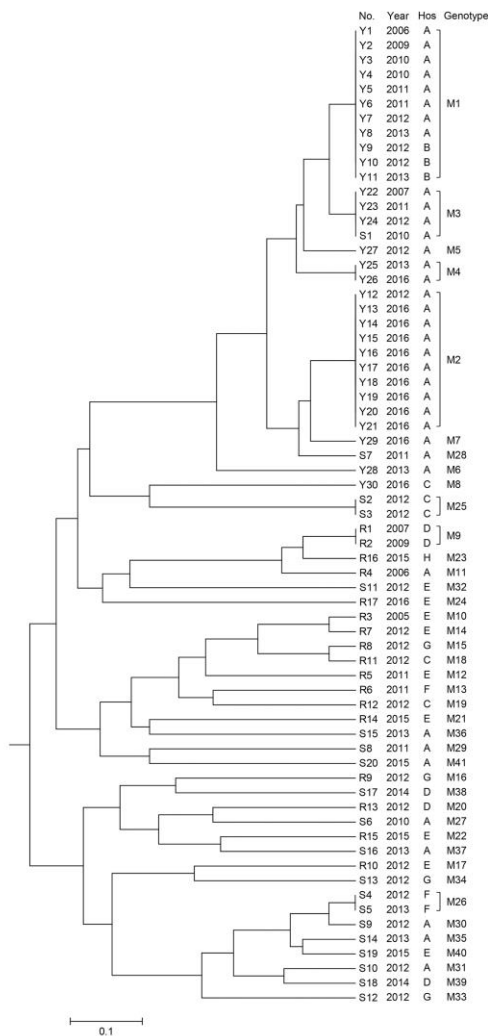

**Technical Appendix Figure.** Results of microsatellite genotyping presented as an unweighted pair group method with arithmetic mean (UPGMA) tree for 67 bloodstream isolates of *Candida parapsilosis* from South Korea. No., numbers of 30 Y132F isolates (Y1–Y30), other 17 fluconazole-resistant isolates (R1–R17), and 20 fluconazole-susceptible isolates (S1–S20); Hos, hospital.
